# Supplementary material for: iPSC-derived mesenchymal stem cells attenuate cerebral ischemia-reperfusion injury by inhibiting inflammatory signaling and oxidative stress
Source: PubMed Central journal article supplement — Mol Ther Methods Clin Dev. 2023 Jul 15;30:333–49. doi: 10.1016/j.omtm.2023.07.005 (PMC10448333; doi:10.1016/j.omtm.2023.07.005), 2023-07-15
Supplement: mmc1.pdf [file mmc1.pdf]

**Supplemental information**

**iPSC-derived mesenchymal stem cells attenuate cerebral ischemia-reperfusion injury by inhibiting inflammatory signaling and oxidative stress**

**Masafumi Arakawa, Yuki Sakamoto, Yoshitaka Miyagawa, Chikako Nito, Shiro Takahashi, Yuko Nitahara-Kasahara, Satoshi Suda, Yoshiyuki Yamazaki, Mashito Sakai, Kazumi Kimura, and Takashi Okada**

## Supplemental Materials

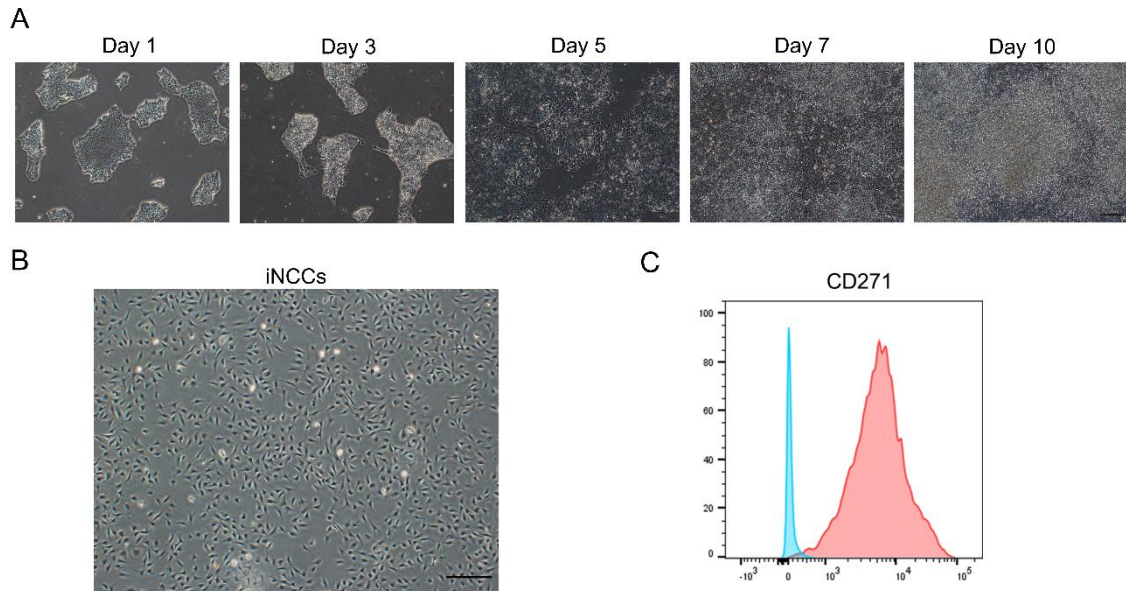

**Figure S1. Morphological changes in the induction of iPSCs to iNCCs and characterization of iNCCs**

(A) Morphological changes of iPSCs during iNCC differentiation (Days 1, 3, 5, 7, and 10.) Scale bar = 200  $\mu$ m. (B) Cell morphology of iNCCs. Scale bar = 200  $\mu$ m. (C) Surface marker analyses of iNCCs using flow cytometry. The blue histogram represents the isotype control and the red overlay represents each antigen. NCC positive marker CD271 was measured.

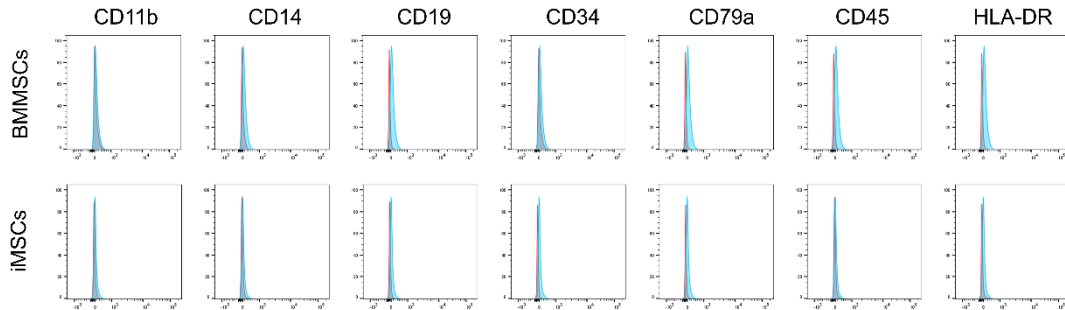

**Figure S2. Surface marker analyses of BMMSCs and iMSCs**

Surface marker analyses of BMMSCs (top) and iMSCs (bottom) using flow cytometry.

The blue histogram represents the isotype control and the red overlay represents each antigen. MSC negative markers CD45, CD34, CD19, CD14, CD11b, CD79a, and HLA-DR were measured.

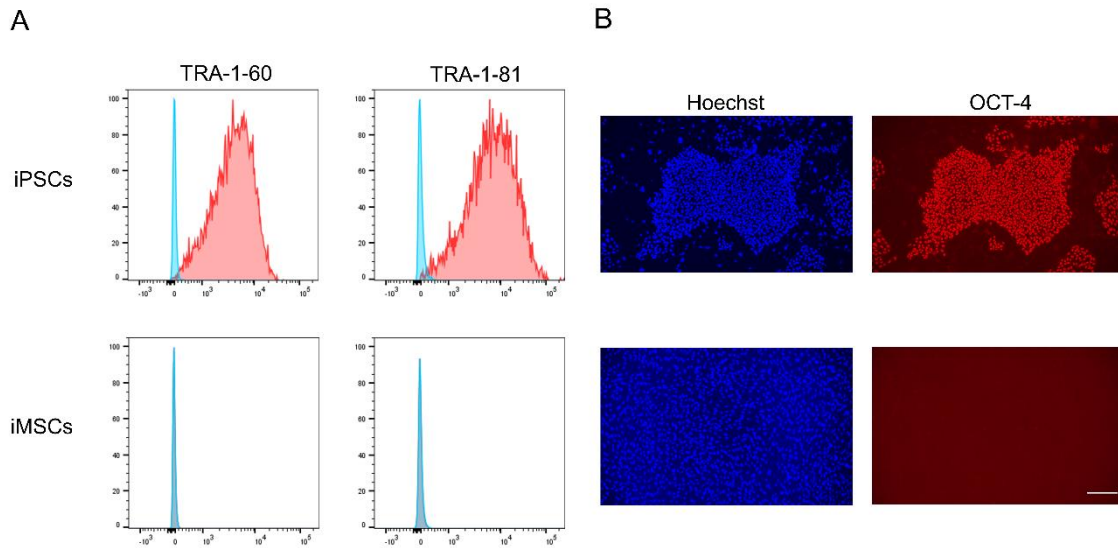

**Figure S3. Surface and intracellular marker analyses of iPSCs and iMSCs**

(A) Surface marker analysis of the pluripotency markers TRA-1-60 and TRA-1-81 in iPSCs and iMSCs using flow cytometry. The expression of TRA-1-60 (left) and TRA-1-81 (right) in iPSCs (top) and iMSCs (bottom) is shown. (B) Oct4 expression was confirmed by immunostaining. Hoechst (left) and Oct4 staining (right) of iPSCs (top) and iMSCs (bottom) are shown. Scale bar = 200  $\mu\text{m}$ .

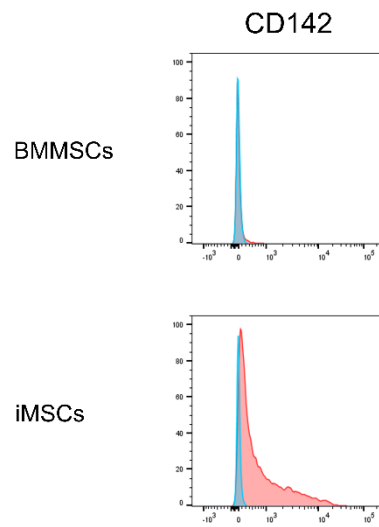

**Figure S4. Evaluation of CD142 expression in BMMSCs and iMSCs**

Surface marker analysis of BMMSCs and iMSCs using flow cytometry. The blue histogram represents the isotype control and the red overlay represents each antigen.

Surface marker analysis of CD142 in BMMSCs (top) and iMSCs (bottom).

**A**

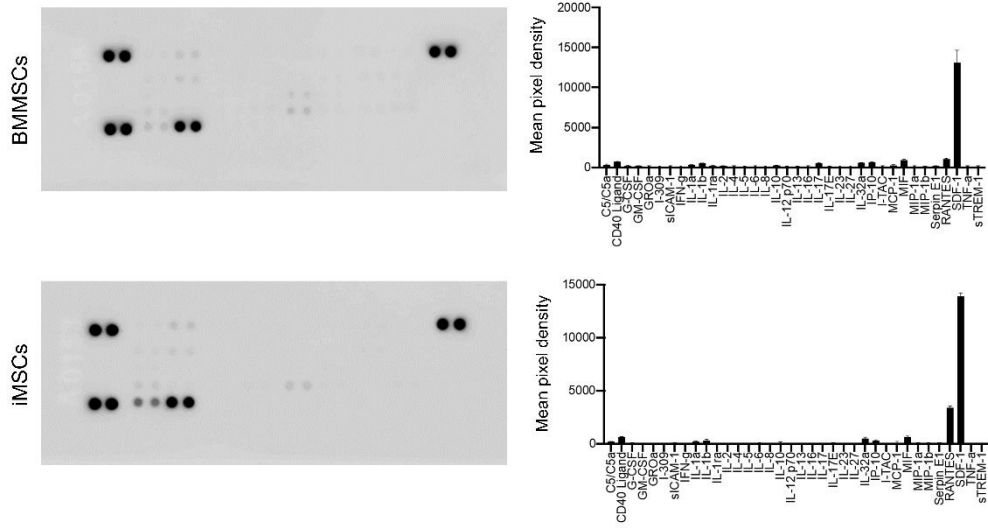

**B**

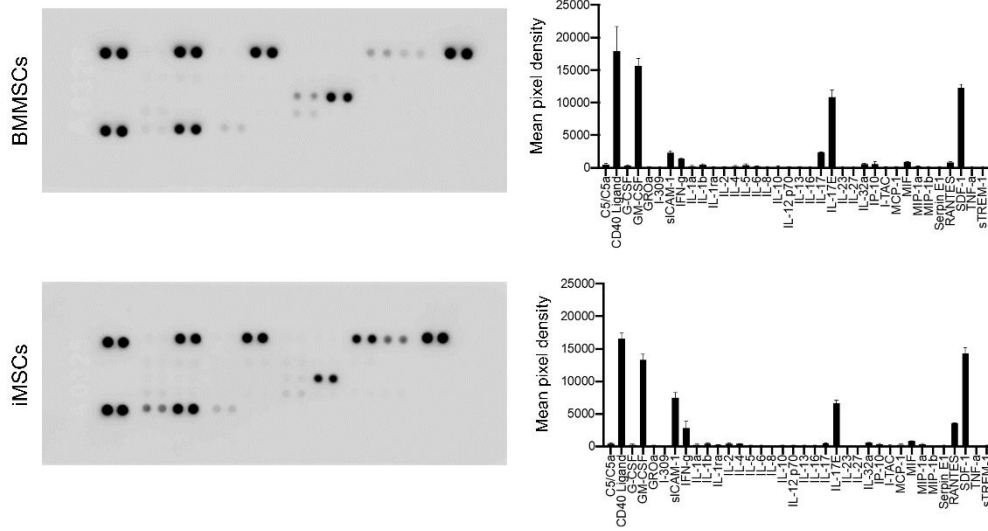

**C**

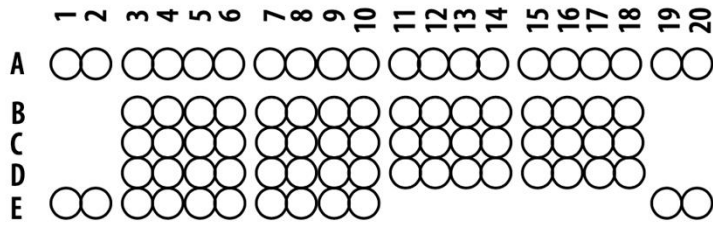

**Figure S5. Comparison of secreted factors in BMMSCs and iMSCs**

Cytokine array analysis of multiple cytokines secreted from BMMSCs (upper) and iMSCs (lower) with (B) or without (A) treatment with 10 ng/ $\mu$ L of TNF- $\alpha$ . The left panels show representative images of cytokine arrays, and the right panels show the profile of cytokine expression. Because cells were stimulated with TNF- $\alpha$ , data on TNF- $\alpha$  was excluded from the profiles of each cytokine array in Figure (B). (C) Coordinates of cytokine array panel. The cytokines corresponding to the coordinates are listed in Table S1.

A

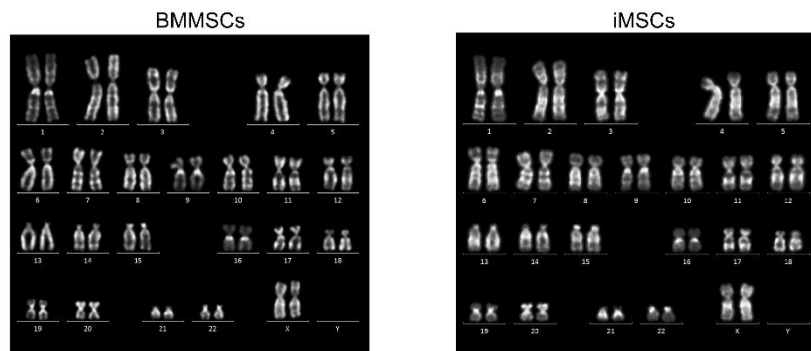

B

|        | Chromosome number |    | Counted nucleus | Modal No. | 4n nucleus | Modal karyotype |
|--------|-------------------|----|-----------------|-----------|------------|-----------------|
|        | 45                | 46 |                 |           |            |                 |
| BMMSCs | 2                 | 18 | 20              | 46        | 1/50 (2%)  | 46,XX           |
| iMSCs  | 2                 | 18 | 20              | 46        | 6/50 (12%) | 46,XX           |

### Figure S6. BMMSCs and iMSCs karyotyping analysis

(A) Representative Q-band analysis results for BMMSCs (left) and iMSCs (right). Most clones showed normal karyotypes. (B) Summary of the karyotype analysis. The chromosome number was counted for 20 nuclei, and the tetraploid (4n) nucleus was counted for 50 nuclei for each sample.



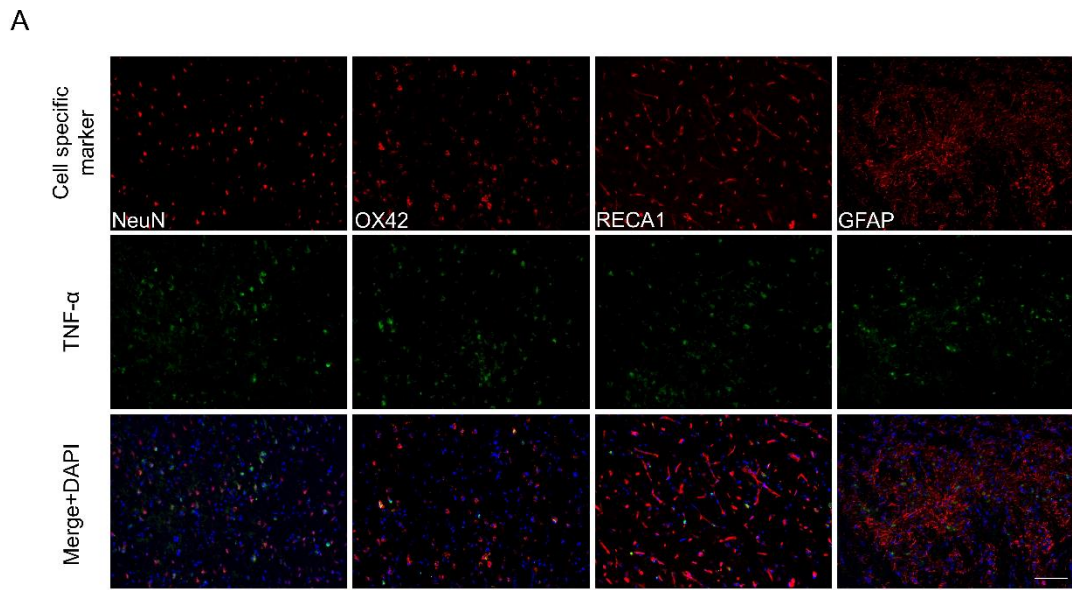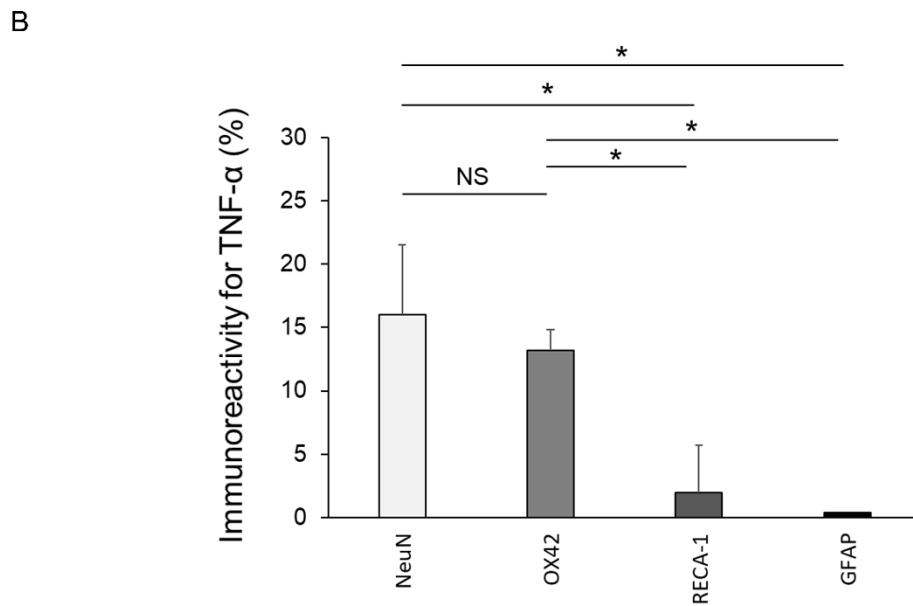

**Figure S7. Identification of TNF- $\alpha$  positive cells in the ischemic side of the brain**

(A) Immunostaining of neuron (NeuN<sup>+</sup>, leftmost vertical column, red), microglial cells (OX42<sup>+</sup>, second vertical column from left, red), endothelial cells (RECA-1<sup>+</sup>, third vertical column from left, red), and astrocytes (GFAP<sup>+</sup>, rightmost vertical column, red) in rat brain

sections. Rat brain sections were also immunostained with TNF- $\alpha$  (middle panels, green). Nuclei were stained in blue with DAPI. Merge overlays of three fluorescence images are shown in the bottom row. Scale bar = 100  $\mu$ m. **(B)** Percentage of TNF- $\alpha$ <sup>+</sup> cells in the field of view (\*p < 0.01; NeuN<sup>+</sup>; n = 5, OX42<sup>+</sup>; n=4, RECA-1<sup>+</sup>; n=5, GFAP<sup>+</sup>; n=4). NS, not significant.

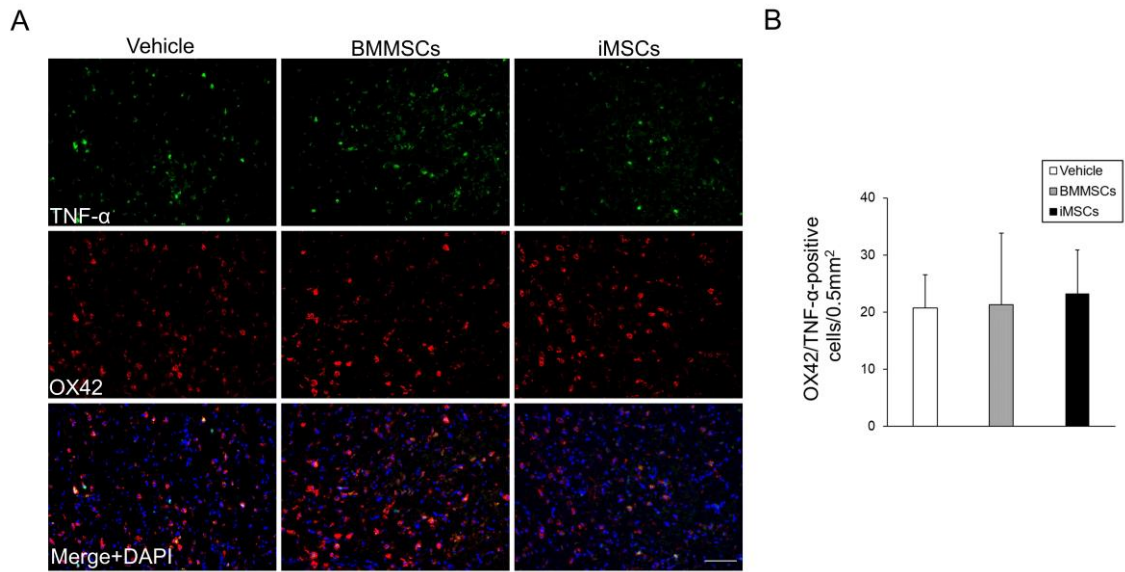

**Figure S8. Identification of OX-42/TNF- $\alpha$  double-positive cells in rat brain**

(A) Immunostaining of OX42<sup>+</sup> microglial cells (middle panels, red) with TNF- $\alpha$  (top panels, green) in rat brain sections treated with vehicle (left vertical column), BMMSCs (middle vertical column), and iMSCs (right vertical column). Nuclei were stained in blue with DAPI. Merge overlays of three fluorescence images are shown in the bottom row. Scale bar = 100  $\mu$ m (B) Comparison of OX42/TNF- $\alpha$ -double-positive cells in the vehicle, BMMSC, and iMSC groups (n = 4 for each group).

Table S1. List of cytokine probes corresponding to the panel coordinates of the cytokine array

| Coordinate | Target (Alternative name) or Control | Full name                                                           |
|------------|--------------------------------------|---------------------------------------------------------------------|
| A1, A2     | Reference Spot                       |                                                                     |
| A3, A4     | C5/C5a                               | Complement component 5/5a                                           |
| A5, A6     | CD40ligand                           | Cluster of differentiation 40                                       |
| A7, A8     | G-CSF                                | Granulocyte colony-stimulating factor                               |
| A9, A10    | GM-CSF                               | Granulocyte macrophage colony-stimulating factor                    |
| A11, A12   | GROa                                 | Growth-related oncogene a                                           |
| A13, A14   | I-309 (CCL1)                         | C-C Motif chemokine ligand 1                                        |
| A15, A16   | sICAM-1                              | soluble intercellular adhesion molecule-1                           |
| A17, A18   | IFN- $\gamma$                        | Interferon-gamma                                                    |
| A19, A20   | Reference Spot                       |                                                                     |
| B3, B4     | IL-1 $\alpha$                        | Interleukin-1alpha                                                  |
| B5, B6     | IL-1 $\beta$                         | Interleukin-1beta                                                   |
| B7, B8     | IL-1ra                               | Interleukin 1 receptor antagonist                                   |
| B9, B10    | IL-2                                 | Interleukin-2                                                       |
| B11, B12   | IL-4                                 | Interleukin-4                                                       |
| B13, B14   | IL-5                                 | Interleukin-5                                                       |
| B15, B16   | IL-6                                 | Interleukin-6                                                       |
| B17, B18   | IL-8                                 | Interleukin-8                                                       |
| C3, C4     | IL-10                                | Interleukin-10                                                      |
| C5, C6     | IL-12p70                             | Interleukin 12A and 12B                                             |
| C7, C8     | IL-13                                | Interleukin-13                                                      |
| C9, C10    | IL-16                                | Interleukin-16                                                      |
| C11, C12   | IL-17                                | Interleukin-17                                                      |
| C13, C14   | IL-17E                               | Interleukin-17E                                                     |
| C15, C16   | IL-23                                | Interleukin-23                                                      |
| C17, C18   | IL-27                                | Interleukin-27                                                      |
| D3, D4     | IL-32 $\alpha$                       | Interleukin-32alfa                                                  |
| D5, D6     | IP-10 (CXCL10)                       | Interferon-gamma inducible protein 10kDa (C-X-C motif chemokine 10) |
| D7, D8     | I-TAC (CXCL11)                       | IFN-inducible T-cell alpha                                          |

|          |                       |                                                                          |
|----------|-----------------------|--------------------------------------------------------------------------|
|          |                       | chemoattractant (C-X-C motif chemokine 11)                               |
| D9, D10  | MCP-1 (CCL2)          | Monocyte chemoattractant protein-1 (C-C Motif Chemokine Ligand 2)        |
| D11, D12 | MiF                   | Mesoderm-inducing factor                                                 |
| D13, D14 | MIP-1 $\alpha$ (CCL3) | Macrophage inflammatory protein-1alfa (C-C Motif Chemokine Ligand 3)     |
| D15, D16 | MIP-1 $\beta$ (CCL4)  | Macrophage inflammatory protein-1beta (C-C Motif Chemokine Ligand 4)     |
| D17, D18 | Serpin E1/PAI-1       | Plasminogen activator inhibitor type 1                                   |
| E1, E2   | Reference Spot        |                                                                          |
| E3, E4   | RANTES                | Regulated on activation, normal T cell expressed and presumably secreted |
| E5, E6   | SDF-1 (CXCL12)        | Stromal cell-derived factor 1 (C-X-C motif chemokine 12)                 |
| E7, E8   | TNF- $\alpha$         | Tumor necrosis factor-alfa                                               |
| E9, E10  | sTREM-1               | Soluble factor triggering receptor Expressed on myeloid cells-1          |
| E19, E20 | Negative Control      |                                                                          |

---
